# Supplementary material for: Identifying sources of groundwater salinity and major hydrogeochemical processes in the Lower Kabul Basin aquifer, Afghanistan
Source: Royal Society of Chemistry journal article supplement (doi:10.1039/d1em00262g), 2021-01-01
Supplement: d1em00262g3.xlsx [file d1em00262g3.xlsx]

## Sheet: Table S1
Table S1. Physiochemical parameters, ionic concentrations and statistical parameters of groundwater samples from the LKB aquifer measured during July to November 2004 (Broshears et al. 2005)
Well ID	Depth	Temp	EC	pH	DO	Ca	Mg	Na	K	Cl	SO4	HCO3	NO3	F	Br	B	SiO2	Fe	Mn	Sr	U	Al	As	Li	Zn
	(m)	(°C)	(μS/cm)	(-)	(mg/L)	(mg/L)	(mg/L)	(mg/L)	(mg/L)	(mg/L)	(mg/L)	(mg/L)	(mg/L)	(mg/L)	(mg/L)	(μg/L)	(mg/L)	(μg/L)	(μg/L)	(μg/L)	(μg/L)	(μg/L)	(μg/L)	(μg/L)	(μg/L)
58	60	16.1	1105	7.3	2.8	60	78	75	5.5	185	0.1	463	8.5	0.3	0.2	880	33	5.5	1.1	1020	7.6	1.2	2.5	184	3
125	34.2	15.8	3420	7.2	12.9	137	104	368	18.4	700	956	460	106.2	0.3	0.3	1000	29	30	9	1900	7.1	1.6	1.1	152	1250
126	60	14.8	1056	7.2	6.3	84	55	61	8.7	76	53	400	37.6	0.2	0.2	785	30	3	1.3	828	6.3	13.1	2.2	90	26.9
131	39.4	15.5	844	7.8	8.6	68	43	46	5.1	55	48	407	4	0.2	0.1	695	27	4.8	0.4	701	4.8	1.6	2.4	109	139
132	25.1	15.9	2760	7	-	235	109	107	12.5	334	113	545	144	0.2	0.4	799	25	9	0.3	2140	4.9	1.6	0.6	167	40
133	27	13.1	1471	7.8	-	70	78	109	54.9	120	128	594	17.3	0.2	0.3	1110	38	3	35.7	818	9.1	1.6	2.3	164	1650
134	49.7	16	1678	7.8	-	48	127	133	7.5	171	168	582	49.6	0.6	0.4	1510	33	8	16.2	1510	9.2	2.4	5.5	263	780
135	26	14.3	1398	7.2	5	63	96	102	7.1	94.5	134	605	27.9	0.5	0.4	1410	23	3	5.1	1230	7.5	2.4	1.1	211	3
138	25	14.2	1320	7.5	4.8	43	100	95.6	5.6	98	110	589	15.9	0.6	0.3	1510	28	14	4.3	941	7.2	3.2	2.4	272	2
139	26	14	1436	7.3	6.3	67	105	105	8.9	99	111	646	3.1	0.5	0.3	1780	28	5	108	1860	16.3	2.5	1.2	314	6
140	60	14.5	1360	7.3	7.4	66	94	99.8	7	89	138	558	16.4	0.5	0.4	1290	31	8	3.2	1520	15.7	2.4	1.1	186	6
141	11.6	15.6	1992	7.7	3.4	41	142	188	9	201	326	571	3.62	0.6	0.5	2240	41	3	1	2410	21.6	4	10.1	341	52
143	25	14.3	1435	7.6	7.5	53	104	110	9.3	100	130	641	21.7	0.5	0.4	1450	26	3	4.8	1460	10.4	2.4	1.8	245	2100
147	50	15.7	672	7.8	8.2	55	34	35	3.8	23	85	279	2.7	0.5	0.2	136	14	5	3.5	994	4.7	1.5	0.3	13	52
148	20.6	18.3	1887	7.4	4.6	95	94	219	4.8	327	312	390	34.5	0.3	0.9	1460	24	3.2	3.4	2430	12.3	2	0.6	173	13
151	35	16.4	1857	7.8	2.3	81	103	175	4.2	307	335	246	7.1	0.6	0.8	1060	26	70	2.7	2080	8	8.3	1.7	78	3
152	27	16	722	7.7	7.1	56	35	41.3	3.2	32.6	113	257	2.7	0.5	0.2	159	14	19	4.7	1090	5.2	1.2	0.4	14	119
153	160	17.8	15290	7.6	2.7	281	481	2570	22.5	4190	2440	489	8.4	1.2	7.7	7900	20	30	236	10500	75.9	22.4	2.8	705	253
154	24.6	14.6	1415	7.8	7.6	39	104	116	5.7	159	103	541	10.2	0.2	0.3	1490	36	10	35.4	945	7.3	2.4	8.5	153	11
156	6.6	15.6	1943	7.4	6.1	114	120	128	14.9	213	211	610	72.6	0.3	0.3	1190	27	4	901	1680	6	4.6	9.9	234	3
157	35	18.2	4941	7.6	5.3	152	255	591	13.7	623	1470	362	156.7	0.8	1.8	160	18	9	16.1	8	36.2	1.3	4.5	257	12
159	28.5	11.9	1428	7.8	10.9	39	114	102	9	132	200	500	0.1	0.6	0.4	1060	18.9	6	33	1150	2.6	1.1	22.7	235	34
160	99.7	13.8	1479	7.6	2.1	52	108	109	7.3	136	124	596	3.9	0.2	0.2	1180	34	4	21.4	1810	11.4	2.4	4.7	164	4
163	20	14.1	1165	7.8	7.8	64	71.9	89.4	5.6	100	85	456	21.7	0.3	0.2	1250	30	3	5.2	267	5.8	2.4	0.9	164	6
164	18	15.2	1389	7.5	5.5	54	76	154	7.6	127	106	550	15.8	0.3	0.3	1130	34	12	3.8	1590	10.2	3.2	1.8	180	40
166.2	85	17	12000	7.7	2.2	334	590	1630	18.4	2750	3030	132	-	0.3	6.1	1650	16	207	66.6	12400	17.6	3.2	0.1	207	453
167	60	16.4	1517	7.7	8.5	92	69	138	7.4	91	407	257	57.1	0.5	0.5	521	34	4	8.4	2020	12.4	1.4	1.9	24	18
169.2	15	16.6	962	7.1	6.9	68	50	61	5.5	69	47	435	-	0.5	0.2	747	22	6	4.7	845	11	1.7	0.3	62	153
170	42.9	16.2	1472	6.9	6.9	72	94	100	6.1	161	94	500	10	0.4	0.2	1380	34	3	3.5	1920	12	3.1	1.8	186	10
171	50	15.3	1368	7.4	7.39	95	62	96	16.5	161	65	450	26.6	0.2	0.2	679	29	3	1.2	475	6.7	1.6	0.8	122	2
172	18	15.2	1522	7.5	8.2	91	89	91	14	126	77	604	18.4	0.4	0.4	1200	32	4	1.4	1430	9.2	1.6	1.3	194	13
173	34.9	14.9	903	7.7	2.1	35	55	72	5.5	64	66	388	17.7	0.3	0.2	1250	19	4	5.1	1200	14.8	2.4	1.5	87	87
175	60	18.3	694	7.9	8.1	40	23	68	2.4	52	93	205	3.9	0.7	0.3	233	24	3	2.7	1080	7.4	1.8	1.4	11	3
176	50	15.4	2375	7.8	6.1	83	175	157	5.5	386	428	380	8	0.2	1	1180	28	9	33.2	2070	10.6	1.2	0.5	130	15
177	8	10.9	6390	8.1	8.7	144	506	608	31.6	1270	1440	468	182	0.4	2.9	3070	32	15	13.2	4350	31.5	2.2	8.8	514	7
178	60	14.9	1080	7.4	2.8	64	68	59	5.1	87	69	441	8.5	0.2	0.3	1020	26	3	0.6	350	6.7	1.6	1.2	128	43
202	51.5	15.4	1045	7.9	10.2	40	64	65	4.4	66	74	399	2.1	0.3	0.2	874	26	3.2	0.9	885	3.8	0.9	0.9	163	16
205	19.7	16	1512	7.6	4.6	54	91	159	6.6	112	150	651	3.6	0.8	0.4	2640	22	16	3.5	2260	12.7	3.7	2.3	266	3
208	38.9	15.5	1127	7.7	9	75.3	58	73	15.3	109	82	410	42.6	0.2	0.1	636	29	3.1	1.1	873	7.2	1.3	1	126	2
219	94.6	18.5	740	7.6	9	55	33	61	2.9	68	128	183	7	0.5	0.3	276	39	8.1	0.7	1160	4.9	21.4	1.9	15	16
220	119.5	20.6	1140	7.8	7.6	81	61	81	5.2	122	287	162	9.9	0.6	0.5	1200	42	13.1	0.8	2280	7.3	0.8	3.3	22	59
Min		10.9	672	6.9	2.1	35	23	35	2.4	23	0.1	132	0.1	0.2	0.1	136	14	3	0.3	8	2.6	0.8	0.1	11	2
Mean		15.5805	2227.07	7.56829	6.40763	86.3488	119.973	230.441	10.1024	350.88	354.539	448.829	30.5031	0.426829	0.763415	1297.32	27.8512	14.122	39.1268	1914.15	11.9293	3.48049	2.97805	178.659	183.12
Median		15.5	1428	7.6	6.9	67	94	102	7.1	122	124	460	15.8	0.4	0.3	1180	28	5	4.3	1430	8	2.2	1.8	164	16
Max		20.6	15290	8.1	12.9	334	590	2570	54.9	4190	3030	651	182	1.2	7.7	7900	42	207	901	12400	75.9	22.4	22.7	705	2100

## Sheet: Table S2
Table S2. Physiochemical parameters, ionic concentrations and statistical parameters of groundwater samples from the LKB aquifer measured during April 2021
Well ID	Depth	Temp	EC	pH	Ca	Mg	Na	K	Cl	SO4	HCO3	NO3	NO₂
	(m)	(°C)	(μS/cm)	(-)	(mg/L)	(mg/L)	(mg/L)	(mg/L)	(mg/L)	(mg/L)	(mg/L)	(mg/L)	(mg/L)
W12	60	17+C4:C24.8	1781	7.3	136	63	73	13.7	117	117	482	29.7	0.12
W13	34.2	17.5	1366	8	51	38	121	5.85	129	156	317	8.9	0.02
W14	60	17.9	9140	7.5	365	456	802	12.48	1193	2348	295	12.8	0.02
W15	39.4	16.3	16430	7.5	169	520	2375	85.8	1621	4582	803	10.6	0.08
W16	25.1	17	945	7.7	27	46	57	4.64	64	65	305	10.6	0.02
W17	27	14.7	1509	7.5	81	65	79	8.19	195	131	309	49.6	0.01
W18	49.7	16.1	1994	7.6	139	64	111	5.07	113	105	728	26.6	0.32
W19	26	15.6	2521	7.2	50	130	201	51.87	319	165	685	5.3	0.36
W20	25	13.7	1865	7.6	22	116	129	25.38	82	118	747	20.8	0.02
W21	26	15.1	1715	7.7	51	107	105	6.24	142	168	526	22.1	0.06
W22	60	18	1642	7.6	47	99	93	6.24	132	123	549	45.2	0.03
W23	11.6	15.7	2350	7.8	48	127	215	5.46	205	409	506	39.8	0.26
W24	25	17.8	13820	7.7	246	478	2075	57.72	3163	2473	307	12	0.33
W25	50	16	1493	7.6	45	99	75	12.9	111	92	592	8.4	0.02
W26	20.6	14.8	1759	7.6	48	111	118	5.85	159	135	578	19.9	0.03
W27	35	17.6	2500	7.6	57	147	167	7.02	254	152	689	58.9	0.27
W28	27	18	1912	7.7	73	124	156	5.7	223	307	433	9.3	0.05
W29	160	17.6	1153	7.7	58	50	63	3.9	83	120	343	18.6	0.02
Min		13.7	945	7.2	22	38	57	3.9	64	65	295	5.3	0.01
Mean		16.4353	3660.83	7.60556	95.1667	157.778	389.722	18.0006	461.389	653.667	510.778	22.7278	0.113333
Median		16.3	1823	7.6	54	109	119.5	6.63	150.5	143.5	516	19.25	0.04
Max		18	16430	8	365	520	2375	85.8	3163	4582	803	58.9	0.36
